# Supplementary material for: Differential expression of mRNA-miRNAs related to intramuscular fat content in the longissimus dorsi in Xinjiang brown cattle
Source: PLoS One. 2018 Nov 9;13(11):e0206757. doi: 10.1371/journal.pone.0206757 (PMC6226300; doi:10.1371/journal.pone.0206757)
Supplement: S2 Table — (XLS) [file pone.0206757.s002.xls]

## Sheet: S2 Table
miRNA id	Y1 Readnum	Y2 Readnum	log2Ratio(Y2/Y1)	Up-Down-Regulation	p-value	q-value
bta-miR-143	732206	8299441	3.57497	UP	0	0
bta-miR-133a	4646173	1424588	-1.63322	DOWN	0	0
bta-miR-3600	1884851	304940	-2.55557	DOWN	0	0
bta-miR-26a	4278949	1645605	-1.30636	DOWN	0	0
bta-miR-26c	1818444	3727832	1.10791	UP	0	0
bta-miR-27a-3p	44147	712341	4.08446	UP	0	0
bta-miR-499	1648182	590501	-1.40858	DOWN	0	0
bta-miR-23a	279515	994239	1.90295	UP	0	0
bta-miR-451	498446	1316570	1.47355	UP	0	0
bta-miR-3596	159645	699433	2.2036	UP	0	0
bta-miR-99a-5p	1000400	1921156	1.01368	UP	0	0
bta-miR-3604	72631	458616	2.73091	UP	0	0
bta-miR-21-5p	41174	381250	3.28321	UP	0	0
bta-miR-23b-3p	204926	565752	1.53735	UP	0	0
bta-let-7i	122715	406585	1.80053	UP	0	0
bta-miR-27b	232102	571627	1.37259	UP	0	0
bta-miR-181a	740197	326448	-1.10878	DOWN	0	0
bta-miR-92a	36549	191326	2.46041	UP	0	0
bta-let-7c	296678	575632	1.02853	UP	0	0
bta-miR-193b	372232	136565	-1.37433	DOWN	0	0
bta-miR-21-3p	295470	112030	-1.32685	DOWN	0	0
bta-miR-378b	64297	7130	-3.1005	DOWN	0	0
bta-miR-486	143791	49214	-1.47455	DOWN	0	0
bta-miR-194	3553	38272	3.50146	UP	0	0
bta-miR-145	65984	138702	1.14408	UP	0	0
bta-miR-125a	14046	56039	2.06855	UP	0	0
bta-miR-497	71793	144132	1.07776	UP	0	0
bta-miR-151-5p	119464	47918	-1.24566	DOWN	0	0
bta-miR-669	8128	42412	2.45578	UP	0	0
bta-miR-139	57060	120271	1.14802	UP	0	0
bta-miR-185	7638	39439	2.44064	UP	0	0
bta-miR-320a	40097	93664	1.29628	UP	0	0
bta-miR-660	99058	39968	-1.23715	DOWN	0	0
bta-miR-362-3p	27928	3940	-2.75317	DOWN	0	0
bta-miR-195	24748	60061	1.3514	UP	0	0
bta-miR-99b	34038	73418	1.18127	UP	0	0
bta-miR-345-5p	6374	28917	2.25393	UP	0	0
bta-miR-150	54684	18853	-1.46405	DOWN	0	0
bta-miR-184	24609	4689	-2.31955	DOWN	0	0
bta-miR-126-5p	31673	65716	1.12527	UP	0	0
bta-miR-15b	4981	23463	2.30816	UP	0	0
bta-miR-708	2312	17045	2.95441	UP	0	0
bta-miR-199c	118	12038	6.74494	UP	0	0
bta-miR-30e-5p	29837	8212	-1.78902	DOWN	0	0
bta-miR-411a	23745	50265	1.15421	UP	0	0
bta-miR-33a	2195	13845	2.72935	UP	0	0
bta-miR-192	15032	35672	1.31903	UP	0	0
bta-miR-30b-5p	36509	13860	-1.32505	DOWN	0	0
bta-miR-2904	19728	5233	-1.84225	DOWN	0	0
bta-miR-455-3p	2383	12774	2.49464	UP	0	0
bta-miR-214	3820	15336	2.07756	UP	0	0
bta-miR-124b	7320	88	-6.30592	DOWN	0	0
bta-miR-122	7929	418	-4.17328	DOWN	0	0
bta-miR-152	1215	8998	2.96093	UP	0	0
bta-miR-130a	11004	25769	1.29989	UP	0	0
bta-miR-500	10972	1889	-2.46585	DOWN	0	0
bta-miR-31	829	7498	3.24934	UP	0	0
bta-miR-1260b	373	5733	4.01432	UP	0	0
bta-miR-101	25711	10872	-1.16949	DOWN	0	0
bta-miR-155	5620	15711	1.55541	UP	0	0
bta-miR-1246	1137	7240	2.74304	UP	0	0
bta-miR-29d-3p	8203	19182	1.29781	UP	0	0
bta-miR-200a	40	4691	6.94603	UP	0	0
bta-miR-30a-5p	28738	13407	-1.02769	DOWN	0	0
bta-miR-2898	1641	8070	2.37027	UP	0	0
bta-miR-6529a	1402	7221	2.43699	UP	0	0
bta-miR-379	7180	16914	1.30844	UP	0	0
bta-miR-208b	19705	8127	-1.20549	DOWN	0	0
bta-miR-30b-3p	6137	14668	1.32935	UP	0	0
bta-miR-3120	6769	15318	1.25049	UP	0	0
bta-miR-365-3p	21689	10163	-1.02136	DOWN	0	0
bta-miR-542-5p	6372	1306	-2.21431	DOWN	0	0
bta-miR-223	902	4976	2.53607	UP	0	0
bta-miR-204	1161	5158	2.22372	UP	0	0
bta-miR-148a	12767	5305	-1.19472	DOWN	0	0
bta-miR-2284z	5767	1332	-2.04195	DOWN	0	0
bta-miR-200b	31	2126	6.17201	UP	0	0
bta-miR-200c	159	2377	3.97432	UP	0	0
bta-miR-6119-5p	3835	742	-2.29746	DOWN	0	0
bta-miR-331-3p	742	3526	2.32082	UP	0	0
bta-miR-2285y	933	3807	2.10099	UP	0	0
bta-miR-425-3p	8082	3257	-1.23889	DOWN	0	0
bta-miR-375	417	2560	2.6903	UP	0	0
novel_mir33	0	3899	13.0012	UP	0	0
bta-miR-301b	6	1539	8.07509	UP	0	0
novel_mir1	2023	316	-2.60622	DOWN	9.06e-286	1.85e-285
bta-miR-224	1914	4609	1.34014	UP	9.76e-281	1.98e-280
bta-miR-769	534	2253	2.14922	UP	9.52e-267	1.92e-266
bta-miR-485	409	1939	2.31742	UP	6.46e-252	1.29e-251
bta-miR-2887	5088	2101	-1.20374	DOWN	1.42e-249	2.82e-249
bta-miR-874	859	2704	1.72664	UP	1.93e-239	3.74e-239
bta-miR-1306	2189	4699	1.17436	UP	3.77e-233	7.26e-233
bta-miR-1296	493	1990	2.08539	UP	4.19e-227	7.97e-227
bta-miR-30f	1948	4172	1.17103	UP	2.61e-206	4.83e-206
bta-miR-424-5p	4590	1999	-1.12694	DOWN	4.74e-203	8.7e-203
bta-miR-193a	210	1270	2.66865	UP	3.26e-194	5.87e-194
bta-miR-381	4705	2176	-1.04024	DOWN	5.81e-183	1.04e-182
bta-miR-9-3p	3881	1654	-1.15819	DOWN	1.25e-179	2.21e-179
novel_mir192	983	94	-3.31418	DOWN	1.68e-176	2.93e-176
bta-miR-149-3p	1797	3718	1.12122	UP	7.79e-172	1.34e-171
bta-miR-218	755	2137	1.57332	UP	2.47e-166	4.22e-166
bta-miR-369-3p	2008	3939	1.04435	UP	2.53e-162	4.3e-162
bta-miR-142-5p	902	2347	1.4519	UP	2.62e-162	4.43e-162
bta-miR-190a	3084	1234	-1.24918	DOWN	4.16e-161	6.98e-161
bta-miR-744	380	1406	1.9598	UP	9.79e-149	1.63e-148
bta-miR-376b	3715	1711	-1.04624	DOWN	3.02e-146	4.97e-146
bta-miR-335	1235	2693	1.19698	UP	1.43e-138	2.28e-138
bta-miR-671	1484	417	-1.75909	DOWN	3.13e-129	4.9e-129
bta-miR-339b	44	578	3.78777	UP	1.38e-121	2.15e-121
novel_mir206	971	194	-2.25113	DOWN	5.89e-117	8.99e-117
bta-miR-363	2154	846	-1.27601	DOWN	7.04e-117	1.07e-116
bta-miR-144	148	802	2.51028	UP	1.8e-115	2.73e-115
bta-miR-2478	379	1233	1.77418	UP	1.83e-114	2.74e-114
bta-miR-877	768	1839	1.33202	UP	3.3e-112	4.93e-112
novel_mir127	0	683	10.488	UP	3.06e-108	4.51e-108
bta-miR-2284aa	46	485	3.47056	UP	5.08e-96	7.39e-96
bta-miR-1247-3p	1407	496	-1.43193	DOWN	1.63e-91	2.35e-91
bta-miR-219-5p	558	0	-10.0518	DOWN	3.4e-90	4.84e-90
bta-miR-326	28	411	3.94792	UP	2.25e-89	3.19e-89
bta-miR-18a	496	1284	1.44451	UP	5.1e-89	7.19e-89
bta-miR-132	448	1205	1.49974	UP	2.33e-88	3.26e-88
bta-miR-197	1147	2204	1.01454	UP	1.61e-87	2.24e-87
novel_mir3	0	516	10.0835	UP	2.42e-87	3.36e-87
bta-miR-502b	1072	327	-1.64066	DOWN	2.8e-85	3.87e-85
bta-miR-2284w	148	664	2.23787	UP	4.91e-84	6.72e-84
novel_mir6	0	401	9.71974	UP	6.97e-72	9.4e-72
bta-miR-383	1315	523	-1.2579	DOWN	1.51e-70	2.02e-70
bta-miR-107	632	1358	1.17577	UP	6.72e-69	8.96e-69
bta-miR-2474	89	471	2.47613	UP	1.44e-67	1.91e-67
novel_mir142	512	1168	1.2621	UP	2.44e-66	3.22e-66
novel_mir128	62	398	2.75471	UP	2.95e-64	3.88e-64
bta-miR-331-5p	198	661	1.81143	UP	5.37e-64	7.03e-64
novel_mir2	752	1490	1.05879	UP	5.65e-64	7.36e-64
bta-miR-1247-5p	558	137	-1.95381	DOWN	4.2e-57	5.37e-57
bta-miR-378d	647	1292	1.07005	UP	1.18e-56	1.51e-56
novel_mir45	664	197	-1.68071	DOWN	2.48e-55	3.13e-55
bta-miR-2443	200	611	1.68345	UP	1.04e-53	1.3e-53
bta-miR-23b-5p	68	364	2.49261	UP	5.11e-53	6.38e-53
bta-miR-4286	19	243	3.74916	UP	7.61e-52	9.42e-52
bta-miR-148b	1233	561	-1.06382	DOWN	4.05e-51	4.99e-51
novel_mir64	524	138	-1.85262	DOWN	3.69e-50	4.52e-50
bta-miR-502a	276	711	1.43746	UP	9.23e-50	1.13e-49
bta-miR-210	969	415	-1.15111	DOWN	7.96e-46	9.6e-46
novel_mir172	0	219	8.84707	UP	1.03e-44	1.23e-44
novel_mir114	0	213	8.80699	UP	9.77e-44	1.16e-43
bta-miR-29e	496	982	1.05766	UP	1.06e-42	1.25e-42
bta-miR-410	326	741	1.25688	UP	1.77e-42	2.07e-42
bta-miR-2419-5p	59	293	2.38439	UP	5.84e-41	6.77e-41
novel_mir216	255	36	-2.75215	DOWN	8.13e-40	9.39e-40
bta-miR-365-5p	461	906	1.04702	UP	6.52e-39	7.47e-39
bta-miR-2331-5p	5	153	5.00774	UP	3.94e-38	4.47e-38
bta-miR-2892	321	685	1.16581	UP	3.55e-35	4.02e-35
bta-miR-188	362	740	1.10382	UP	7.99e-35	9e-35
bta-miR-2331-3p	330	687	1.13012	UP	1.21e-33	1.36e-33
bta-miR-19a	743	332	-1.0899	DOWN	1.09e-32	1.21e-32
novel_mir160	0	147	8.27195	UP	1.64e-32	1.8e-32
novel_mir140	0	142	8.22203	UP	1.28e-31	1.41e-31
bta-miR-6525	183	458	1.39578	UP	2.52e-31	2.75e-31
bta-miR-2285s	443	156	-1.43348	DOWN	4.51e-30	4.84e-30
bta-miR-1224	37	198	2.49218	UP	1.27e-29	1.36e-29
novel_mir194	0	127	8.06096	UP	6.79e-29	7.17e-29
novel_mir232	0	127	8.06096	UP	6.79e-29	7.17e-29
novel_mir233	67	251	1.97773	UP	2.44e-28	2.57e-28
bta-miR-1434-3p	234	55	-2.01673	DOWN	6.3e-26	6.5e-26
bta-miR-376c	153	377	1.37331	UP	1.75e-25	1.8e-25
bta-miR-677	136	14	-3.20783	DOWN	2.83e-25	2.89e-25
bta-miR-6524	198	438	1.21771	UP	1.26e-24	1.28e-24
novel_mir10	0	103	7.75878	UP	2.22e-24	2.25e-24
bta-miR-628	327	112	-1.47351	DOWN	1.64e-23	1.65e-23
bta-miR-2366	64	221	1.86018	UP	2.67e-23	2.66e-23
novel_mir218	0	97	7.67219	UP	3.24e-23	3.22e-23
bta-miR-105a	336	119	-1.42522	DOWN	5.11e-23	5.07e-23
bta-miR-2284ac	187	410	1.20487	UP	8.51e-23	8.41e-23
bta-miR-323	165	376	1.26055	UP	1.8e-22	1.77e-22
bta-miR-2285ac	138	335	1.35177	UP	2.56e-22	2.5e-22
novel_mir115	0	89	7.54801	UP	1.22e-21	1.19e-21
bta-miR-299	112	288	1.43485	UP	4.25e-21	4.11e-21
bta-miR-3432b	469	211	-1.08007	DOWN	5.97e-21	5.75e-21
novel_mir205	0	80	7.39421	UP	7.82e-20	7.48e-20
novel_mir156	0	78	7.35768	UP	2e-19	1.9e-19
bta-miR-2346	95	251	1.47397	UP	2.74e-19	2.58e-19
novel_mir98	0	74	7.28173	UP	1.32e-18	1.24e-18
bta-miR-7861	278	107	-1.30519	DOWN	4.37e-17	4.05e-17
bta-miR-2483-5p	74	204	1.53525	UP	7.3e-17	6.72e-17
novel_mir67	99	242	1.36179	UP	9.96e-17	9.15e-17
bta-miR-6518	24	115	2.33281	UP	1.15e-16	1.05e-16
bta-miR-452	88	224	1.4202	UP	1.59e-16	1.45e-16
novel_mir174	0	64	7.07228	UP	1.64e-16	1.49e-16
novel_mir14	65	0	-6.95009	DOWN	4.13e-16	3.73e-16
bta-miR-130b	175	342	1.03892	UP	1.64e-15	1.48e-15
novel_mir111	0	57	6.90517	UP	5.24e-15	4.7e-15
bta-miR-377	112	23	-2.21151	DOWN	1.13e-14	1.01e-14
novel_mir113	189	64	-1.48996	DOWN	1.86e-14	1.65e-14
novel_mir63	57	0	-6.76061	DOWN	1.9e-14	1.68e-14
novel_mir204	0	54	6.82717	UP	2.37e-14	2.08e-14
novel_mir117	28	112	2.07228	UP	2.92e-14	2.56e-14
novel_mir9	72	185	1.43374	UP	4.34e-14	3.77e-14
bta-miR-2355-3p	3	55	4.26868	UP	6.4e-14	5.52e-14
bta-miR-545-3p	128	33	-1.88333	DOWN	9.86e-14	8.45e-14
novel_mir46	0	49	6.68699	UP	3.03e-13	2.58e-13
novel_mir65	15	81	2.50524	UP	4.15e-13	3.51e-13
novel_mir28	29	107	1.95577	UP	8.34e-13	7.02e-13
novel_mir159	0	47	6.62687	UP	8.53e-13	7.15e-13
bta-miR-1343-5p	138	266	1.01904	UP	4.7e-12	3.92e-12
bta-miR-33b	8	60	2.97917	UP	8.16e-12	6.76e-12
novel_mir213	13	71	2.52159	UP	9.54e-12	7.89e-12
novel_mir72	70	166	1.31804	UP	1.97e-11	1.62e-11
bta-miR-330	77	175	1.2567	UP	3.19e-11	2.6e-11
novel_mir23	0	40	6.39421	UP	3.39e-11	2.75e-11
bta-miR-211	24	90	1.97917	UP	3.74e-11	3.02e-11
novel_mir91	41	0	-6.28527	DOWN	5.53e-11	4.46e-11
novel_mir148	0	39	6.35768	UP	5.79e-11	4.65e-11
novel_mir236	21	83	2.055	UP	7.56e-11	6.07e-11
bta-miR-2409	9	58	2.76034	UP	9.94e-11	7.95e-11
bta-miR-129-3p	15	69	2.27391	UP	2.57e-10	2.05e-10
novel_mir16	0	35	6.20156	UP	5.04e-10	3.96e-10
novel_mir102	0	35	6.20156	UP	5.04e-10	3.96e-10
novel_mir109	0	35	6.20156	UP	5.04e-10	3.96e-10
novel_mir12	66	151	1.26629	UP	5.57e-10	4.37e-10
bta-miR-135b	142	53	-1.34955	DOWN	7.19e-10	5.62e-10
novel_mir227	36	0	-6.09765	DOWN	7.42e-10	5.78e-10
novel_mir24	0	34	6.15974	UP	8.72e-10	6.73e-10
novel_mir249	0	34	6.15974	UP	8.72e-10	6.73e-10
novel_mir138	122	43	-1.43219	DOWN	2.3e-09	1.77e-09
bta-miR-2889	91	181	1.06433	UP	3.41e-09	2.62e-09
bta-miR-2397-3p	12	58	2.3453	UP	3.52e-09	2.7e-09
novel_mir209	62	12	-2.29695	DOWN	4.09e-09	3.12e-09
novel_mir19	0	31	6.02648	UP	4.58e-09	3.49e-09
novel_mir87	0	30	5.97917	UP	8.01e-09	6.07e-09
bta-miR-136	176	80	-1.06522	DOWN	1.28e-08	9.68e-09
bta-miR-2436-5p	39	4	-3.21312	DOWN	2.6e-08	1.95e-08
bta-miR-7857	23	74	1.75817	UP	3.1e-08	2.32e-08
novel_mir90	29	0	-5.7857	DOWN	3.12e-08	2.32e-08
novel_mir180	29	0	-5.7857	DOWN	3.12e-08	2.32e-08
novel_mir166	0	27	5.82717	UP	4.36e-08	3.23e-08
novel_mir202	0	26	5.77272	UP	7.73e-08	5.65e-08
novel_mir21	133	56	-1.17565	DOWN	8.61e-08	6.28e-08
novel_mir11	102	37	-1.39069	DOWN	9.13e-08	6.64e-08
novel_mir195	27	0	-5.68261	DOWN	9.31e-08	6.74e-08
novel_mir188	0	25	5.71614	UP	1.37e-07	9.83e-08
novel_mir108	0	25	5.71614	UP	1.37e-07	9.83e-08
novel_mir185	0	25	5.71614	UP	1.37e-07	9.83e-08
novel_mir244	0	25	5.71614	UP	1.37e-07	9.83e-08
bta-miR-2285e	92	32	-1.45128	DOWN	1.6e-07	1.14e-07
novel_mir93	0	24	5.65724	UP	2.45e-07	1.74e-07
bta-miR-656	6	37	2.69677	UP	3.35e-07	2.35e-07
novel_mir230	0	23	5.59584	UP	4.38e-07	3.04e-07
novel_mir151	0	23	5.59584	UP	4.38e-07	3.04e-07
novel_mir219	0	23	5.59584	UP	4.38e-07	3.04e-07
novel_mir36	0	23	5.59584	UP	4.38e-07	3.04e-07
novel_mir110	24	0	-5.51268	DOWN	4.91e-07	3.39e-07
bta-miR-654	49	107	1.19904	UP	5.69e-07	3.92e-07
bta-miR-346	91	34	-1.34805	DOWN	8.29e-07	5.65e-07
novel_mir184	65	127	1.0386	UP	1.22e-06	8.28e-07
bta-miR-219	54	14	-1.87525	DOWN	1.43e-06	9.73e-07
novel_mir41	51	107	1.14132	UP	1.52e-06	1.03e-06
bta-miR-2903	72	24	-1.51268	DOWN	1.74e-06	1.18e-06
bta-miR-147	10	42	2.14267	UP	1.98e-06	1.33e-06
novel_mir251	0	20	5.39421	UP	2.57e-06	1.71e-06
novel_mir208	0	20	5.39421	UP	2.57e-06	1.71e-06
bta-miR-1814c	0	20	5.39421	UP	2.57e-06	1.71e-06
novel_mir82	0	20	5.39421	UP	2.57e-06	1.71e-06
novel_mir226	21	0	-5.32004	DOWN	2.67e-06	1.77e-06
novel_mir196	0	19	5.32021	UP	4.68e-06	3.09e-06
bta-miR-6523a	34	78	1.27022	UP	7.88e-06	5.19e-06
novel_mir229	0	18	5.2422	UP	8.55e-06	5.62e-06
bta-miR-27a-5p	96	42	-1.12037	DOWN	1.21e-05	7.91e-06
novel_mir211	0	17	5.15974	UP	1.57e-05	1.01e-05
novel_mir56	0	17	5.15974	UP	1.57e-05	1.01e-05
novel_mir57	0	17	5.15974	UP	1.57e-05	1.01e-05
novel_mir241	0	17	5.15974	UP	1.57e-05	1.01e-05
bta-miR-2328-5p	0	17	5.15974	UP	1.57e-05	1.01e-05
novel_mir231	0	17	5.15974	UP	1.57e-05	1.01e-05
novel_mir107	0	17	5.15974	UP	1.57e-05	1.01e-05
novel_mir66	0	17	5.15974	UP	1.57e-05	1.01e-05
novel_mir149	45	90	1.07228	UP	2.75e-05	1.76e-05
novel_mir30	0	16	5.07228	UP	2.89e-05	1.84e-05
novel_mir100	0	16	5.07228	UP	2.89e-05	1.84e-05
novel_mir145	13	42	1.76416	UP	2.91e-05	1.85e-05
novel_mir17	16	47	1.62687	UP	2.96e-05	1.87e-05
bta-miR-615	35	75	1.17182	UP	3.93e-05	2.48e-05
novel_mir250	16	0	-4.92772	DOWN	4.85e-05	3.02e-05
novel_mir124	16	0	-4.92772	DOWN	4.85e-05	3.02e-05
bta-miR-105b	16	0	-4.92772	DOWN	4.85e-05	3.02e-05
novel_mir193	16	0	-4.92772	DOWN	4.85e-05	3.02e-05
novel_mir212	16	0	-4.92772	DOWN	4.85e-05	3.02e-05
bta-miR-2299-5p	16	0	-4.92772	DOWN	4.85e-05	3.02e-05
bta-miR-6530	2	19	3.32021	UP	5.32e-05	3.28e-05
novel_mir38	0	15	4.97917	UP	5.36e-05	3.28e-05
novel_mir31	0	15	4.97917	UP	5.36e-05	3.28e-05
novel_mir221	0	15	4.97917	UP	5.36e-05	3.28e-05
novel_mir154	0	15	4.97917	UP	5.36e-05	3.28e-05
novel_mir186	0	15	4.97917	UP	5.36e-05	3.28e-05
novel_mir75	0	15	4.97917	UP	5.36e-05	3.28e-05
bta-miR-106a	79	34	-1.14404	DOWN	5.41e-05	3.3e-05
bta-miR-2312	17	1	-4.01518	DOWN	6.42e-05	3.91e-05
bta-miR-2285ae	1	16	4.07228	UP	6.54e-05	3.97e-05
bta-miR-2465	25	4	-2.57158	DOWN	6.71e-05	4.07e-05
bta-miR-503-3p	65	26	-1.24965	DOWN	8.58e-05	5.18e-05
novel_mir201	15	0	-4.83461	DOWN	8.78e-05	5.28e-05
novel_mir173	15	0	-4.83461	DOWN	8.78e-05	5.28e-05
novel_mir116	0	14	4.87963	UP	9.99e-05	5.89e-05
novel_mir47	0	14	4.87963	UP	9.99e-05	5.89e-05
novel_mir88	0	14	4.87963	UP	9.99e-05	5.89e-05
novel_mir246	0	14	4.87963	UP	9.99e-05	5.89e-05
novel_mir80	0	14	4.87963	UP	9.99e-05	5.89e-05
novel_mir62	0	14	4.87963	UP	9.99e-05	5.89e-05
novel_mir164	0	14	4.87963	UP	9.99e-05	5.89e-05
novel_mir22	0	14	4.87963	UP	9.99e-05	5.89e-05
bta-miR-20b	80	36	-1.07972	DOWN	0.000105583	6.21e-05
novel_mir167	14	0	-4.73508	DOWN	0.000159656	9.25e-05
novel_mir163	14	0	-4.73508	DOWN	0.000159656	9.25e-05
novel_mir70	14	0	-4.73508	DOWN	0.000159656	9.25e-05
novel_mir137	14	0	-4.73508	DOWN	0.000159656	9.25e-05
novel_mir177	14	0	-4.73508	DOWN	0.000159656	9.25e-05
bta-miR-219-3p	36	72	1.07228	UP	0.000176444	0.000102031
bta-miR-4449	10	33	1.79475	UP	0.000176964	0.000102116
novel_mir203	0	13	4.77272	UP	0.000187188	0.000105566
novel_mir78	0	13	4.77272	UP	0.000187188	0.000105566
novel_mir150	0	13	4.77272	UP	0.000187188	0.000105566
novel_mir50	0	13	4.77272	UP	0.000187188	0.000105566
novel_mir105	0	13	4.77272	UP	0.000187188	0.000105566
novel_mir92	0	13	4.77272	UP	0.000187188	0.000105566
novel_mir240	0	13	4.77272	UP	0.000187188	0.000105566
novel_mir132	0	13	4.77272	UP	0.000187188	0.000105566
novel_mir169	0	13	4.77272	UP	0.000187188	0.000105566
novel_mir147	0	13	4.77272	UP	0.000187188	0.000105566
novel_mir155	0	13	4.77272	UP	0.000187188	0.000105566
bta-miR-6527	9	31	1.85655	UP	0.000199604	0.000112337
bta-miR-2311	77	36	-1.02458	DOWN	0.000268037	0.000150232
bta-miR-2376	32	65	1.09465	UP	0.000290263	0.000162357
novel_mir96	0	12	4.65724	UP	0.000352779	0.000192599
novel_mir76	0	12	4.65724	UP	0.000352779	0.000192599
novel_mir253	0	12	4.65724	UP	0.000352779	0.000192599
novel_mir222	0	12	4.65724	UP	0.000352779	0.000192599
novel_mir228	0	12	4.65724	UP	0.000352779	0.000192599
novel_mir71	0	12	4.65724	UP	0.000352779	0.000192599
novel_mir183	0	12	4.65724	UP	0.000352779	0.000192599
novel_mir141	0	12	4.65724	UP	0.000352779	0.000192599
novel_mir126	0	12	4.65724	UP	0.000352779	0.000192599
novel_mir245	10	31	1.70455	UP	0.00045467	0.000247731
novel_mir168	12	0	-4.51268	DOWN	0.000535794	0.000287918
novel_mir54	12	0	-4.51268	DOWN	0.000535794	0.000287918
novel_mir238	12	0	-4.51268	DOWN	0.000535794	0.000287918
novel_mir224	12	0	-4.51268	DOWN	0.000535794	0.000287918
novel_mir198	12	0	-4.51268	DOWN	0.000535794	0.000287918
bta-miR-2426	7	25	1.90878	UP	0.000665886	0.00035531
novel_mir191	0	11	4.53171	UP	0.000669	0.00035531
novel_mir217	0	11	4.53171	UP	0.000669	0.00035531
novel_mir34	0	11	4.53171	UP	0.000669	0.00035531
novel_mir35	0	11	4.53171	UP	0.000669	0.00035531
novel_mir189	0	11	4.53171	UP	0.000669	0.00035531
bta-miR-2888	54	23	-1.15905	DOWN	0.000743679	0.000393445
bta-miR-1225-3p	18	42	1.29467	UP	0.000875066	0.000461171
novel_mir103	11	0	-4.38715	DOWN	0.000989636	0.000519549
novel_mir248	11	0	-4.38715	DOWN	0.000989636	0.000519549
bta-miR-7860	15	37	1.37484	UP	0.00107099	0.00056118
novel_mir42	0	10	4.39421	UP	0.00127708	0.000662821
novel_mir39	0	10	4.39421	UP	0.00127708	0.000662821
novel_mir176	0	10	4.39421	UP	0.00127708	0.000662821
bta-miR-2891	16	38	1.32021	UP	0.00131066	0.000678961
novel_mir119	10	0	-4.24965	DOWN	0.00183873	0.000947137
